# Supplementary material for: Novel paper sensor with modified aptamer for accurate detection of clinical cardiac troponin I
Source: Royal Society of Chemistry journal article supplement (doi:10.1039/d5nr00073d), 2025-01-01
Supplement: d5nr00073d1.pdf [file d5nr00073d1.pdf]

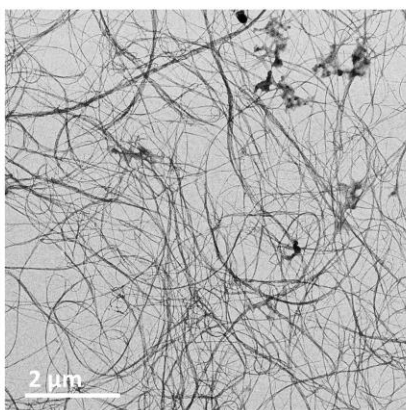

SWCNTs in water

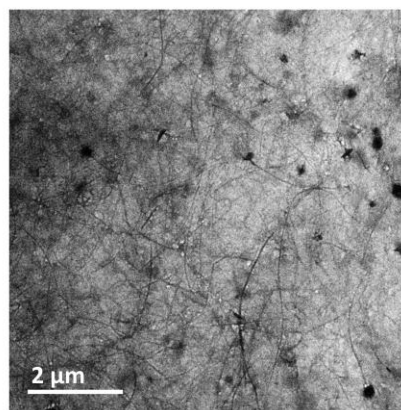

SWCNTs in PEDOT:PSS

**Figure S1. TEM morphology of SWCNTs' dispersibility and integrity in water or PEDOT:PSS.**

| Name      | Sequence (5' to 3')                                                     |
|-----------|-------------------------------------------------------------------------|
| Ap-CTnI   | 5'-ATATATATAT CGTGCAGTACGCCAACCTTTCTCATGCGCTGCCCTCTTA-3'                |
| Api1-CTnI | 5'-ATATATATAT/Sp18/CGTGCAGTACGCCAACCTTTCTCATGCGCTGCCCTCTTA-3'           |
| Api2-CTnI | 5'-ATATATATAT/Sp18/Sp18/CGTGCAGTACGCCAACCTTTCTCATGCGCTGCCCTCTTA-3'      |
| Api3-CTnI | 5'-ATATATATAT/Sp18/Sp18/Sp18/CGTGCAGTACGCCAACCTTTCTCATGCGCTGCCCTCTTA-3' |

**Figure S2. The sequence of modified CTnI aptamers.**

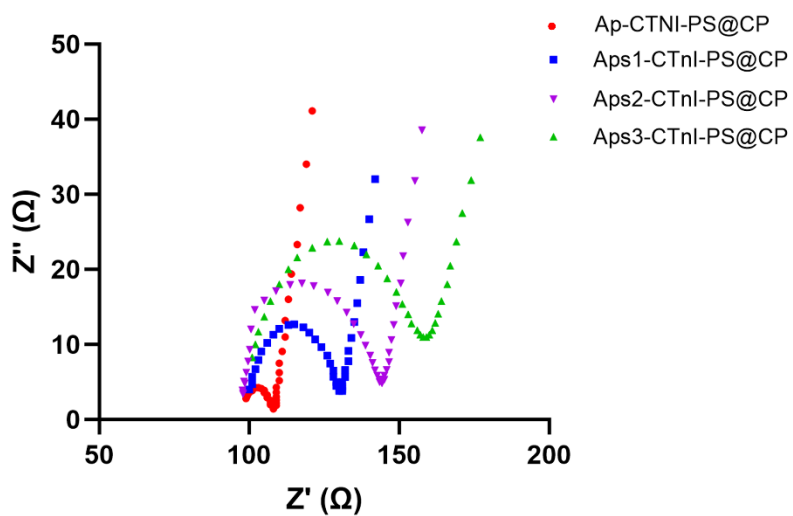

|                 | $R_{ct}$ ( $\Omega$ ) | $K_{ct}$ ( $\text{cm}^2/\text{s}$ ) | $K_{et}$ ( $\text{cm}^2/\text{s}$ ) |
|-----------------|-----------------------|-------------------------------------|-------------------------------------|
| Ap-CTnI-PS@CP   | 10.48                 | $9.2 \times 10^{-3}$                | $8.3 \times 10^{-3}$                |
| Aps1-CTnI-PS@CP | 30.15                 | $3.2 \times 10^{-4}$                | $3.2 \times 10^{-4}$                |
| Aps2-CTnI-PS@CP | 45.25                 | $2.1 \times 10^{-4}$                | $2.1 \times 10^{-4}$                |
| Aps3-CTnI-PS@CP | 63.15                 | $1.5 \times 10^{-4}$                | $1.5 \times 10^{-4}$                |

**Figure S3. The Nyquist plot of modified PS@CP with different aptamers.**

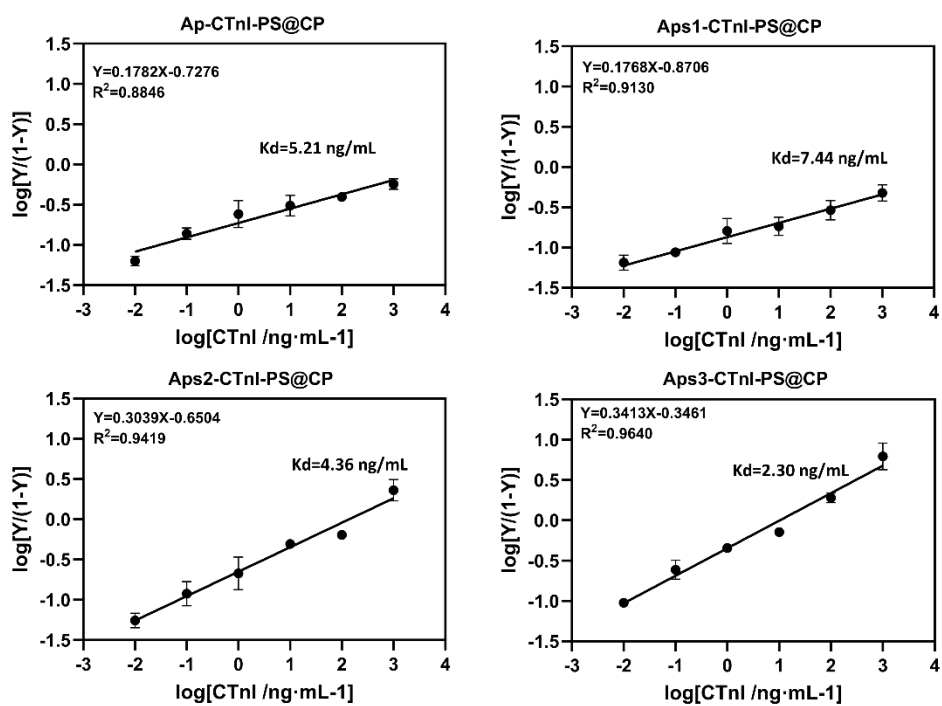

Figure S4. Hill plot,  $\log Y/(1-Y)$  as a function of  $\log$  [aptamers] where  $Y = \Delta R_{ct}/\Delta R_{ct(max)}$ ,  $\Delta R_{ct}$  and  $\Delta R_{ct(max)}$  is changing in charge transfer resistance.

**Table S1. CTnI of different concentrations detection by the Aps3-CTnI-PS@CP.**

| CTnI added (ng/mL) | CTnI founded (Mean±SD) | Recovery % | RSD% | Student's t-test |
|--------------------|------------------------|------------|------|------------------|
| 0                  | No detection           | -          | -    | -                |
| 0.01               | 0.00982±0.0002         | 98.20      | 2.34 | P >0.05          |
| 0.1                | 0.0992±0.0019          | 99.20      | 1.81 | P >0.05          |
| 1                  | 0.977±0.03             | 97.70      | 3.07 | P >0.05          |
| 10                 | 9.81±0.38              | 98.10      | 3.88 | P >0.05          |

**Table S2. The repeatability the Aps3-CTnI-PS@CP to assess the interday, during 3 days in the presence of 10ng/mL CTnI.**

| day   | CTnI-Known (ng/mL) | CTnI-Obtained (ng/mL) | Average | SD    | RSD (%) | t <sub>calculated</sub> | t <sub>critical</sub> |
|-------|--------------------|-----------------------|---------|-------|---------|-------------------------|-----------------------|
| day 1 | 10                 | 9.754                 | 9.917   | 0.156 | 1.570   | 0.531                   | 4.303                 |
| day 2 | 10                 | 10.064                |         |       |         |                         |                       |
| day 3 | 10                 | 9.934                 |         |       |         |                         |                       |

**Table S3. The repeatability the Aps3-CTnI-PS@CP to assess the intraday 3 times in the presence of 10ng/mL CTnI.**

| day   | CTnI-Known (ng/mL) | CTnI-Obtained (ng/mL) | Average | SD    | RSD (%) | t <sub>calculated</sub> | t <sub>critical</sub> |
|-------|--------------------|-----------------------|---------|-------|---------|-------------------------|-----------------------|
| day 1 | 10                 | 9.583                 | 9.821   | 0.297 | 3.027   | 0.713                   | 4.105                 |
|       | 10                 | 10.154                |         |       |         |                         |                       |
|       | 10                 | 9.725                 |         |       |         |                         |                       |
